# Supplementary material for: On a Response Surface Analysis: Hydrodeoxygenation of Phenol over a CoMoS-Based Active Phase
Source: MDPI journal article supplement (doi:10.3390/catal12101139), 2022-09-28
Supplement: s1 [file s1]

## Supplementary Information

Table S1. Raw observations obtained from the experimental design.

| N° | Temperature<br>(°C) | Pressure<br>(MPa) | Loading<br>of Mo<br>(wt.%) | R <sub>Ph0</sub> (mol <sup>Phenol</sup><br>/g <sub>cat</sub> s) x10 <sup>8</sup> | Selectivity<br>HYD/DDO |
|----|---------------------|-------------------|----------------------------|----------------------------------------------------------------------------------|------------------------|
| 1  | 360                 | 5.5               | 12                         | 481                                                                              | 0.21                   |
| 2  | 320                 | 4                 | 12                         | 14                                                                               | 0.54                   |
| 3  | 360                 | 3                 | 12                         | 261                                                                              | 0.3                    |
| 4  | 280                 | 3                 | 12                         | 1.1                                                                              | 0.78                   |
| 5  | 320                 | 3                 | 10                         | 5                                                                                | 0.62                   |
| 6  | 280                 | 4                 | 10                         | 1.5                                                                              | 0.97                   |
| 7  | 360                 | 4                 | 15                         | 150                                                                              | 0.43                   |
| 8  | 280                 | 4                 | 15                         | 1.8                                                                              | 0.96                   |
| 9  | 280                 | 5.5               | 12                         | 2.3                                                                              | 0.97                   |
| 10 | 320                 | 5.5               | 10                         | 33                                                                               | 0.6                    |
| 11 | 360                 | 4                 | 10                         | 198                                                                              | 0.32                   |
| 12 | 320                 | 5.5               | 15                         | 47                                                                               | 0.59                   |
| 13 | 320                 | 3                 | 15                         | 26                                                                               | 0.53                   |
